# Supplementary material for: Electrocatalysis of hydrogen production by active site analogues of the iron hydrogenase enzyme: structure/function relationships
Source: Royal Society of Chemistry journal article supplement (doi:10.1039/b304283a), 2003-01-01
Supplement: b304283a.pdf [file b304283a.pdf]

Supporting Information

for

**Electrocatalysis of Hydrogen Production by Active Site Analogues of the Iron  
Hydrogenase Enzyme: Structure/Function Relationships**

Daesung Chong, Irene Georgakaki, Rosario Mejia-Rodriguez, Jean Sanabria-Chinchilla,  
Manuel P. Soriaga and Marcetta Y. Darensbourg\*

*Department of Chemistry, Texas A&M University, College Station, TX 77843*

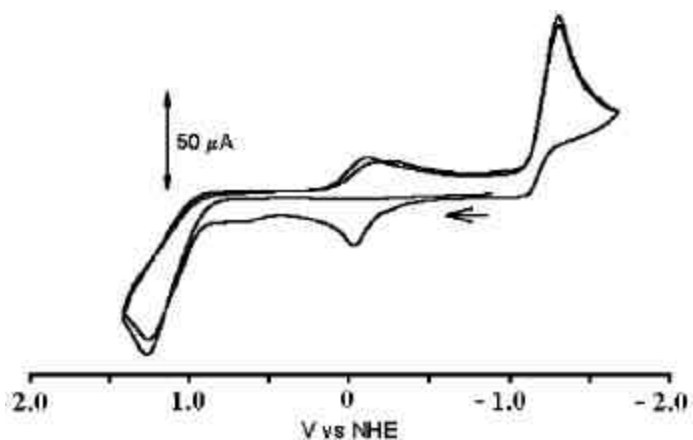

**Fig. 1S** Cyclic voltammogram of complex (μ-SEt)<sub>2</sub>[Fe(CO)<sub>3</sub>]<sub>2</sub> (**1**) to the anodic direction.

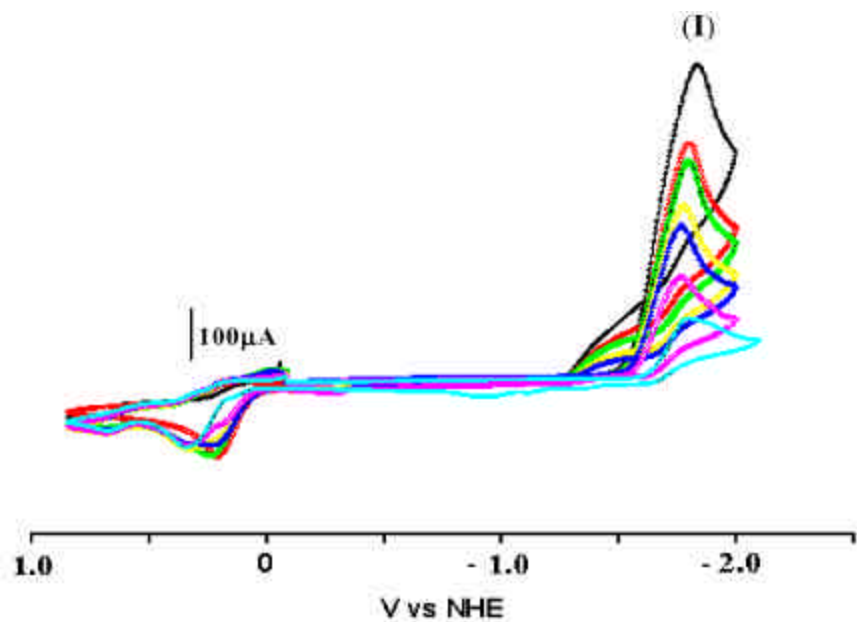

**Fig. 2S** Cyclic voltammograms of **4-P** (2.5 mM) with HOAc (0, 25, 50, 75, 100, 125 mM) in CH<sub>3</sub>CN (0.1 M *n*-Bu<sub>4</sub>NBF<sub>4</sub>) with electrochemical parameters as described in Table 1. **(I)**: Fe<sup>I</sup>Fe<sup>I</sup>/Fe<sup>0</sup>Fe<sup>I</sup>, ca. -1.80 V.

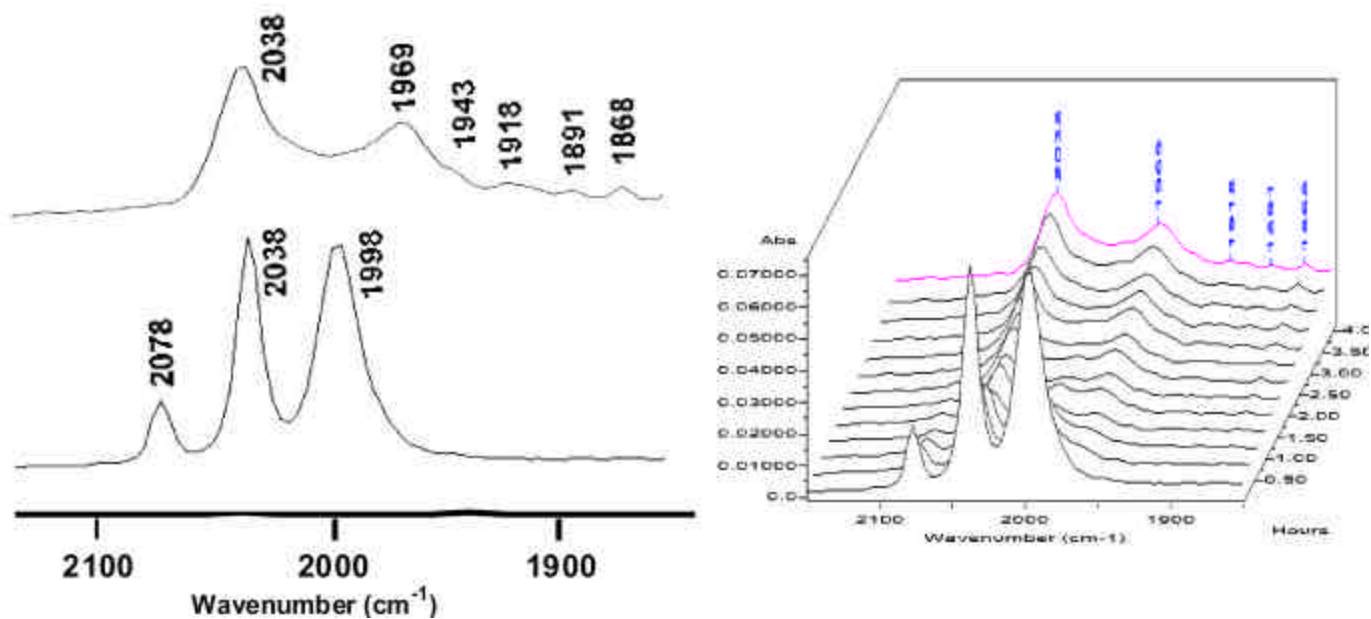

**Fig. 3S** *In situ* IR spectra during bulk electrolysis for **2** (7.5 mM) in the presence acid (HOAc, 150 mM) at -1.34 V in CH<sub>3</sub>CN solution (0.1 M *n*-Bu<sub>4</sub>NBF<sub>4</sub>) with electrochemical parameters as described in Table 1.

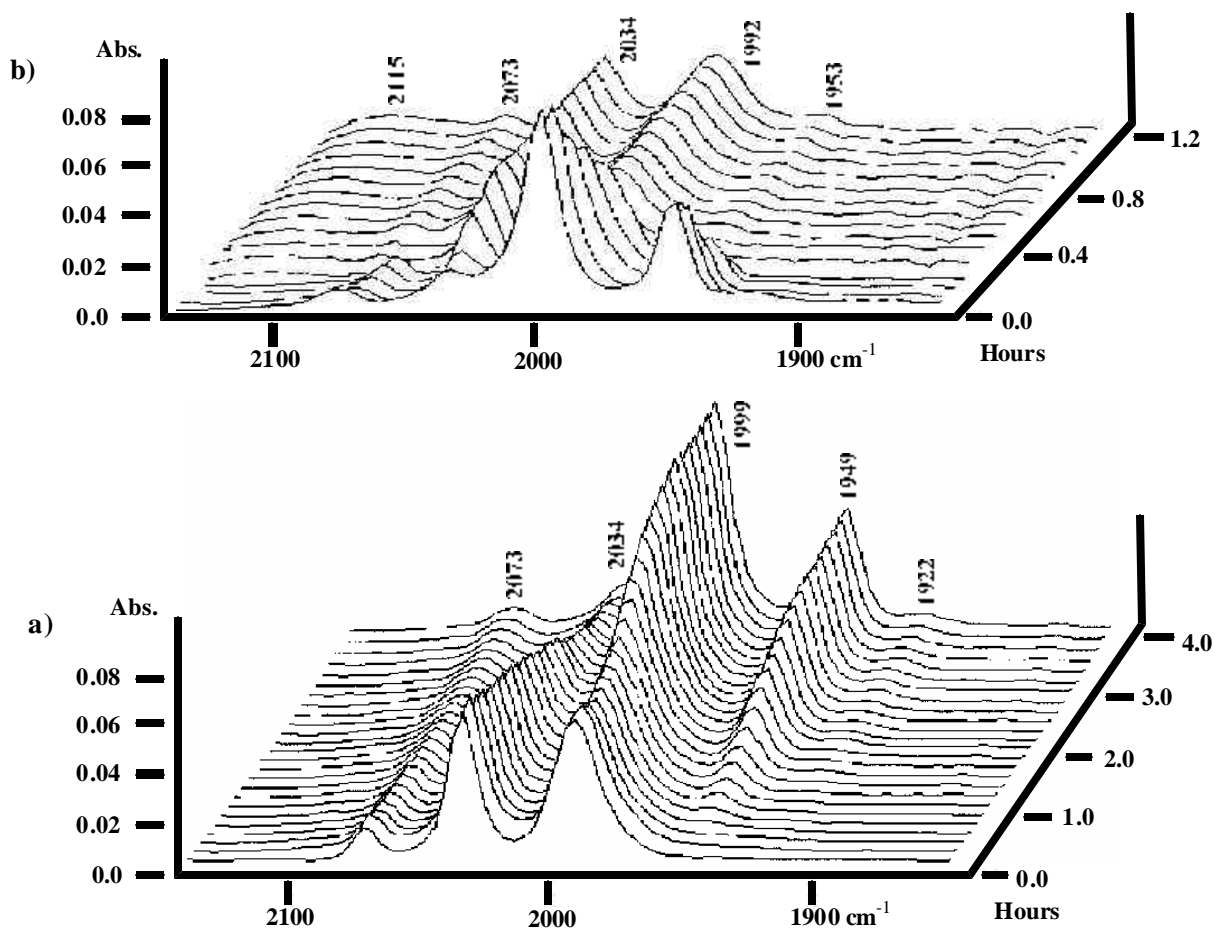

**Fig. 4S** *In situ* IR spectra during bulk electrolysis for **1** (7.5 mM) a) reduction process at -1.34 V and b) re-oxidation process at -0.95 V in CH<sub>3</sub>CN solution (0.1 M *n*-Bu<sub>4</sub>NBF<sub>4</sub>) with electrochemical parameters as described in Table 1.
